# Supplementary material
Source: MDPI journal article supplement (https://www.mdpi.com/1424-8247/14/12/1248)
Supplement: s1 [file s1]

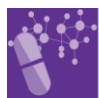

Supplementary materials

# Anti-Inflammatory Potential of Daturaolone from *Datura innoxia* Mill.: In Silico, In Vitro and In Vivo Studies

Muhammad Waleed Baig <sup>1</sup>, Humaira Fatima <sup>1</sup>, Nosheen Akhtar <sup>2</sup>, Hidayat Hussain <sup>3</sup>, Mohammad K. Okla <sup>4</sup>, Abdulrahman Al-Hashimi<sup>4</sup> Wahidah H. Al-Qahtani <sup>5</sup>, Hamada Abdelgawad <sup>6</sup> and Ihsan-ul Haq <sup>1,\*</sup>

**Citation:** Baig, M.W.; Fatima, H.; Akhtar, N.; Hussain, H.; Okla, M.K.; Al-Aashimi, A.; Al-Qahtani, W.H.; Abdelgawad, H.; Haq IU. Anti-Inflammatory Potential of Daturaolone from *Datura innoxia* Mill.: In Silico, In Vitro and In Vivo Studies. *Pharmaceuticals* **2021**, *14*, x. <https://doi.org/10.3390/xxxxx>

<sup>1</sup> Department of Pharmacy, Quaid-i-Azam University, Islamabad 45320, Pakistan; mwb7@yahoo.com (M.W.B.); hfchughtai@qau.edu.pk (H.F.)

<sup>2</sup> Department of Biological Sciences, National University of Medical Sciences, Rawalpindi 46000, Pakistan; nosheenakhtar@numspak.edu.pk

<sup>3</sup> Leibniz Institute of Plant Biochemistry, Department of Bioorganic Chemistry, Weinberg 3, D-06120 Halle (Salle), Germany; hidayat.hussain@ipb-halle.de

<sup>4</sup> Botany and Microbiology Department, College of Science, King Saud University, P.O. Box 2455, Riyadh 11451, Saudi Arabia; malokla@ksu.edu.sa (M.K.O.); alhashimi@ksu.edu.sa (A.A.-H.),

<sup>5</sup> Department of Food Sciences & Nutrition, College of Food & Agriculture Sciences, King Saud University, Riyadh 11451, Saudi Arabia; wahida@ksu.edu.sa (W.H.A.-Q.)

<sup>6</sup> Integrated Molecular Plant Physiology Research (IMPRES), Department of Biology, University of Antwerp 2020, Groenenborgerlaan 171, Antwerp, Belgium; hamada.abdelgawad@uantwerpen.be (H.A.)

\* Correspondence: ihsn99@yahoo.com; Tel.: +92-321-5123877

Academic Editors: Dejan Stojković and Marina Sokovic

Received: 19 October 2021

Accepted: 23 November 2021

Published: 30 November 2021

**Publisher's Note:** MDPI stays neutral with regard to jurisdictional claims in published maps and institutional affiliations.

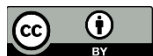

**Copyright:** © 2021 by the authors. Submitted for possible open access publication under the terms and conditions of the Creative Commons Attribution (CC BY) license (<http://creativecommons.org/licenses/by/4.0/>).

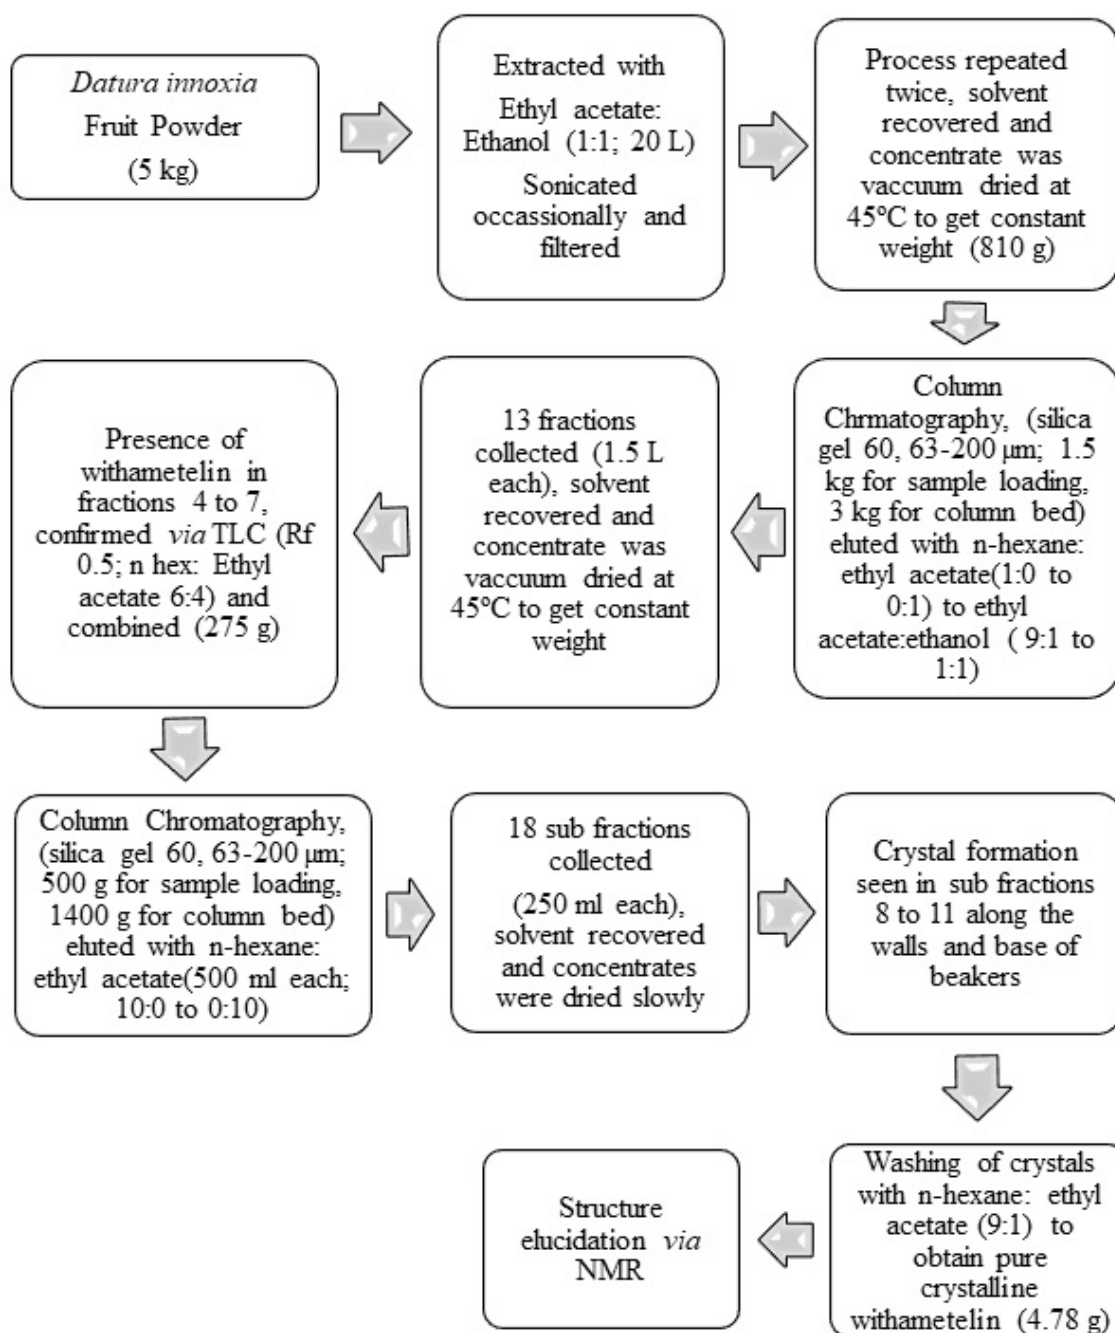

Figure S1.a. Isolation scheme of daturaolone.

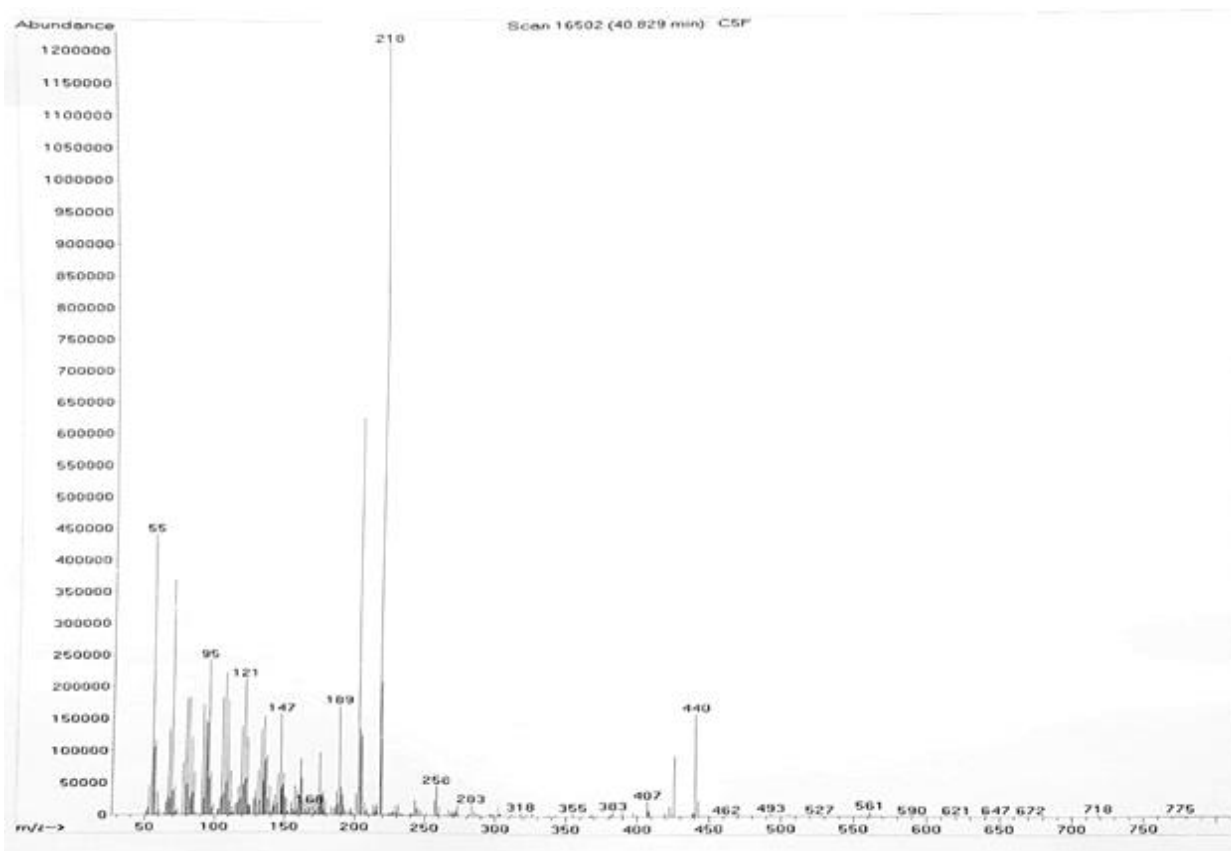

Figure S1b. GC-MS spectra of daturaolone

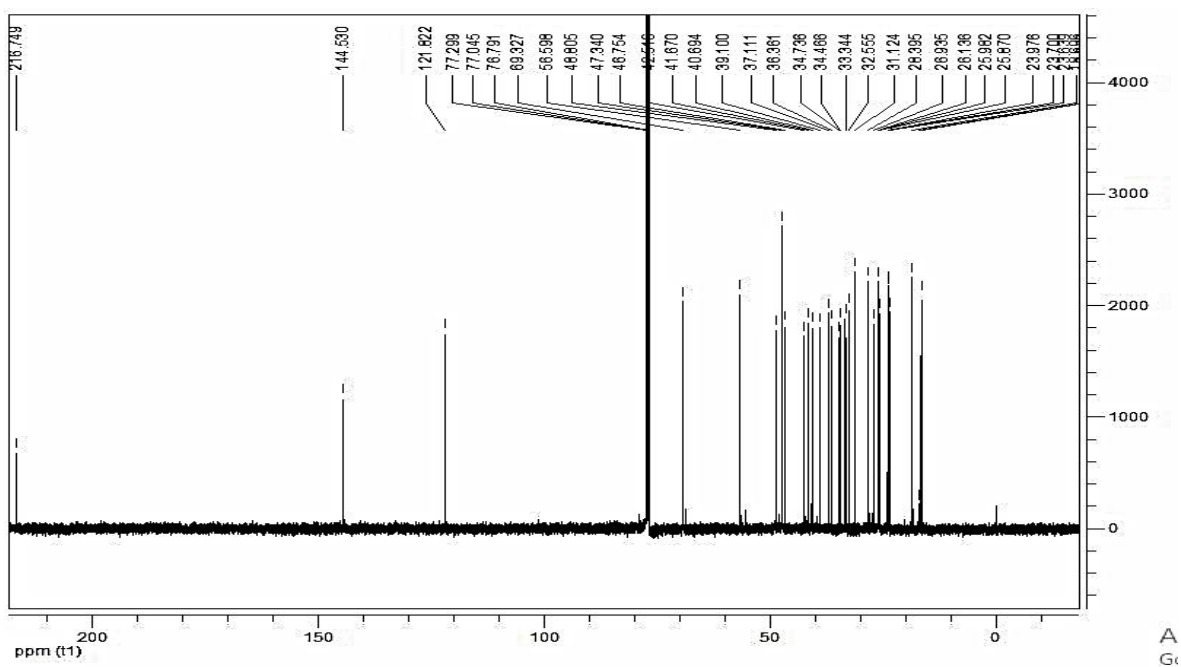

Figure S1c.  $^{13}\text{C}$ -NMR

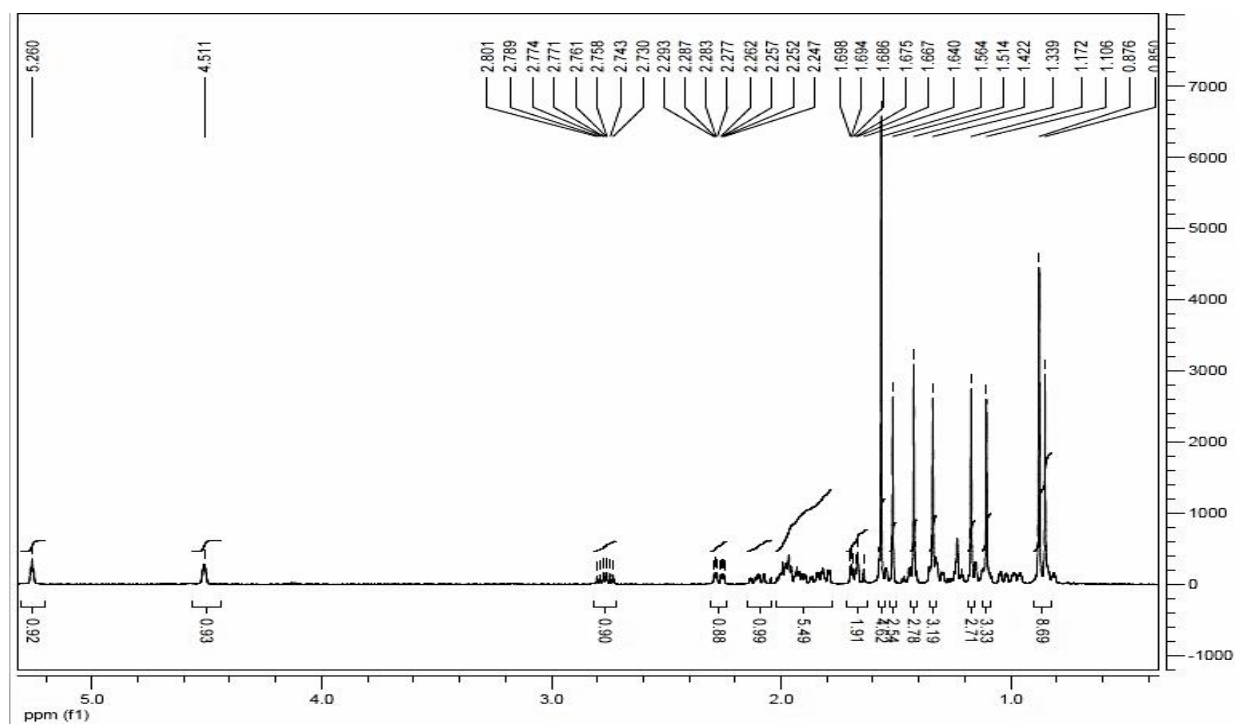

Figure S1d. <sup>1</sup>H-NMR

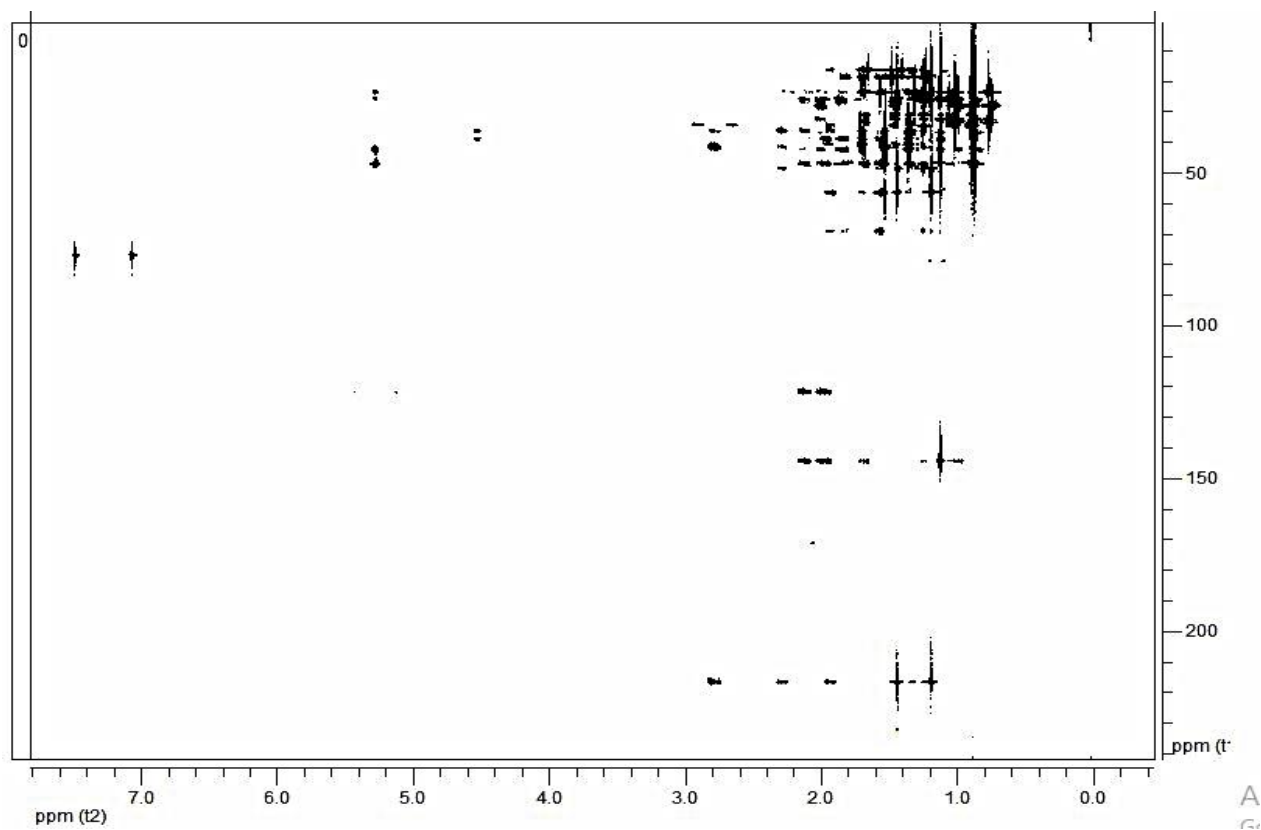

**Figure S1e.** HSQC NMR

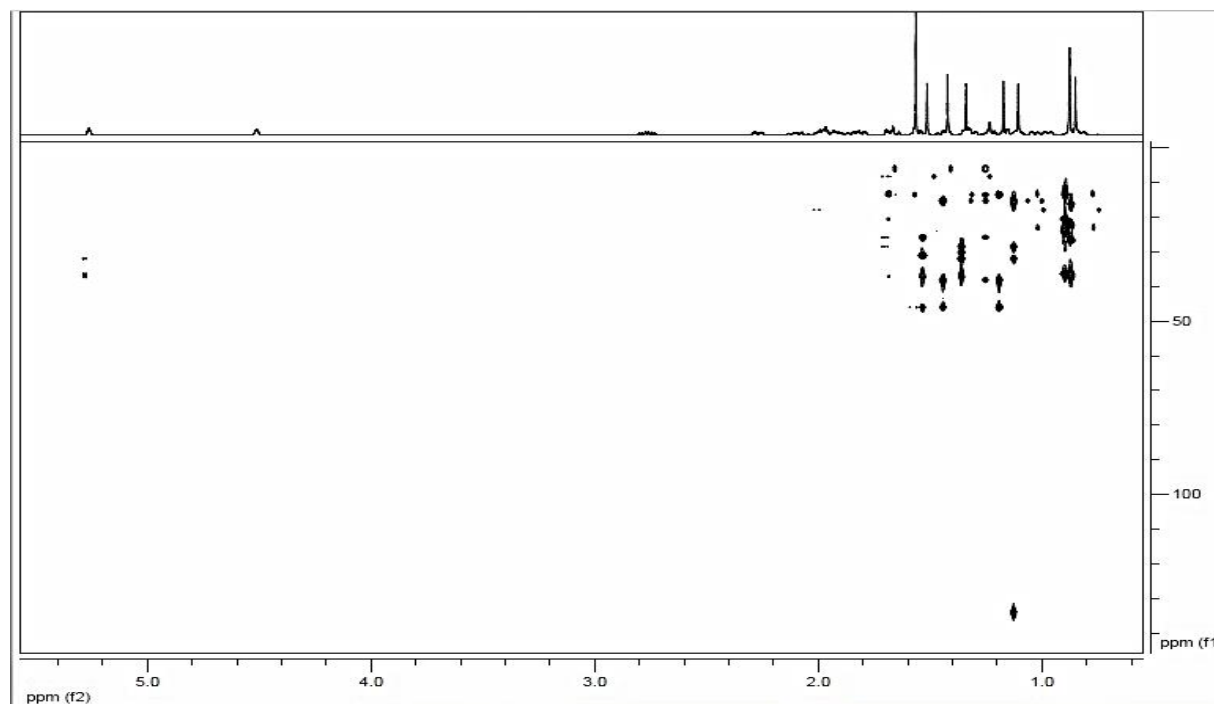

Figure S1f. HMBC NMR

50039080128  
nmrgcossydcf CDC13 (C:\NMRDATA\EXTERNAL\PHARMACY) user 76

Current Data Parameters  
NAME: 175614\_NA\_50039080128  
EXPNO: 2  
PROCNO: 1

F2 - Acquisition Parameters  
Date\_: 20170619  
Time: 16.10 h  
INSTRUM: spect  
PROBHD: zll9470\_0008 (4096  
PULPROG: zgpg30  
TD: 65536  
SOLVENT: cdcl3  
NS: 16  
DS: 4  
SWH: 6009.615 Hz  
FIDRES: 2.934382 Hz  
AQ: 0.3407872 sec  
RG: 203  
SW: 83.200 ussec  
DE: 6.50 ussec  
TE: 300.2 K  
D0: 0.0000647 sec  
D1: 2.30000000 sec  
D13: 0.00000400 sec  
D16: 0.00000000 sec  
IN0: 0.00016660 sec  
TD0: 1  
SFO1: 500.1328507 MHz  
NUC1: 1H  
P1: 14.00 ussec  
P2: 28.00 ussec  
PL1: 15.48799992 W  
SFO2: 500.132 MHz  
F2RES: 46.893757 Hz  
SW: 12.002 ppm  
F2WDW: Shaped-TF2  
SI: 4096  
SF: 500.1300123 MHz  
WDW: EM  
SSB: 0 Hz  
GB: 0  
PC: 1.40

F1 - Acquisition parameters  
TD: 256  
SFO1: 500.132 MHz  
FIDRES: 46.893757 Hz  
SW: 12.002 ppm  
F2WDW: Shaped-TF2  
SI: 4096  
SF: 500.1300123 MHz  
WDW: EM  
SSB: 0 Hz  
GB: 0  
PC: 1.40

F1 - Processing parameters  
SI: 1024  
MC2: States-TF2  
SF: 500.1300126 MHz  
WDW: EM  
SSB: 0 Hz  
GB: 0  
PC: 1.40

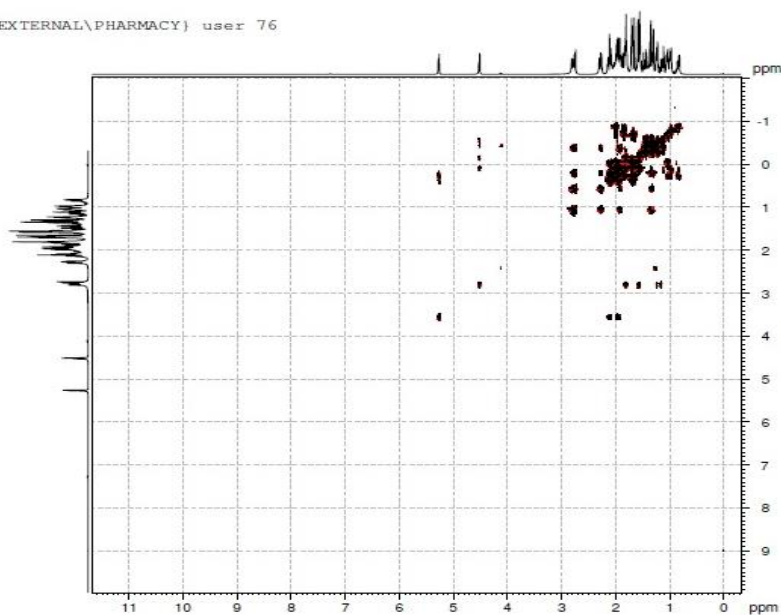

Figure S1g. COSY NMR

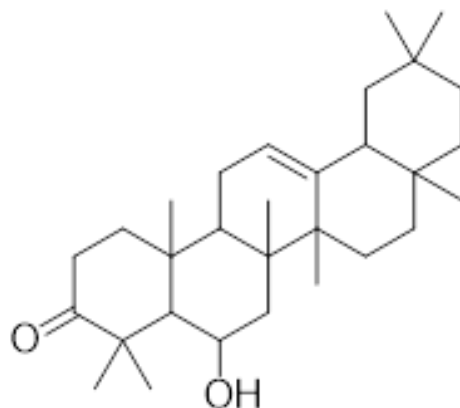

**Figure S1h.** Elucidated structure of daturaolone

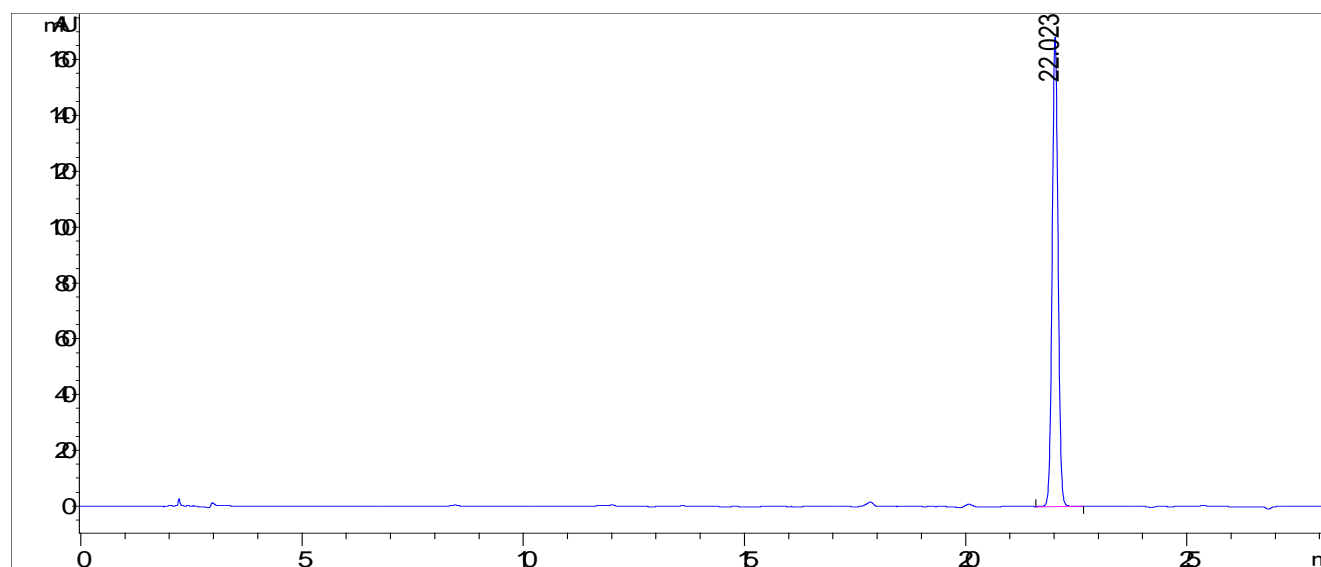

**Figure S1i.** HPLC DAD Chromatogram of daturaolone.

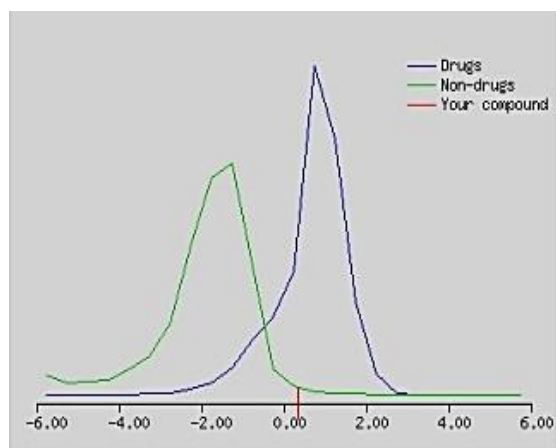

**Figure S2.** Drug likeliness prediction by molsoft with score of 0.33



**Table S1.** ADME data table of Daturaolone from SWISS ADME

| Molecule                  | Daturaolone                                                                   |
|---------------------------|-------------------------------------------------------------------------------|
| Canonical SMILES          | <chem>OC1CC2(C)C(C3(C1C(C)(C)C(=O)CC3)C)CC=C1C2(C)CCC2(C1CC(CC2)(C)C)C</chem> |
| Formula                   | C <sub>30</sub> H <sub>48</sub> O <sub>2</sub>                                |
| MW                        | 440.7                                                                         |
| #Heavy atoms              | 32                                                                            |
| #Aromatic heavy atoms     | 0                                                                             |
| Fraction Csp <sup>3</sup> | 0.9                                                                           |
| #Rotatable bonds          | 0                                                                             |
| #H-bond acceptors         | 2                                                                             |
| #H-bond donors            | 1                                                                             |
| MR                        | 135.08                                                                        |
| TPSA                      | 37.3                                                                          |
| iLOGP                     | 4.37                                                                          |
| XLOGP3                    | 7.49                                                                          |
| WLOGP                     | 7.35                                                                          |
| MLOGP                     | 5.89                                                                          |
| Silicos-IT Log P          | 6.61                                                                          |
| Consensus Log P           | 6.34                                                                          |
| ESOL Log S                | -7.29                                                                         |
| ESOL Solubility (mg/ml)   | 2.25E-05                                                                      |
| ESOL Solubility (mol/l)   | 5.12E-08                                                                      |
| ESOL Class                | Poorly soluble                                                                |
| Ali Log S                 | -8.11                                                                         |
| Ali Solubility (mg/ml)    | 3.45E-06                                                                      |

|                                     |                |
|-------------------------------------|----------------|
| Ali Solubility<br>(mol/l)           | 7.82E-09       |
| Ali Class                           | Poorly soluble |
| Silicos-IT<br>LogSw                 | -7.04          |
| Silicos-IT<br>Solubility<br>(mg/ml) | 4.02E-05       |
| Silicos-IT<br>Solubility<br>(mol/l) | 9.12E-08       |
| Silicos-IT<br>class                 | Poorly soluble |
| BBB permeant                        | No             |
| Pgp substrate                       | No             |
| Lipinski<br>#violations             | 1              |
| Bioavailability<br>Score            | 0.55           |
| PAINS #alerts                       | 0              |
| Brenk #alerts                       | 1              |
| Leadlikeness<br>#violations         | 2              |
| Synthetic<br>Accessibility          | 5.95           |

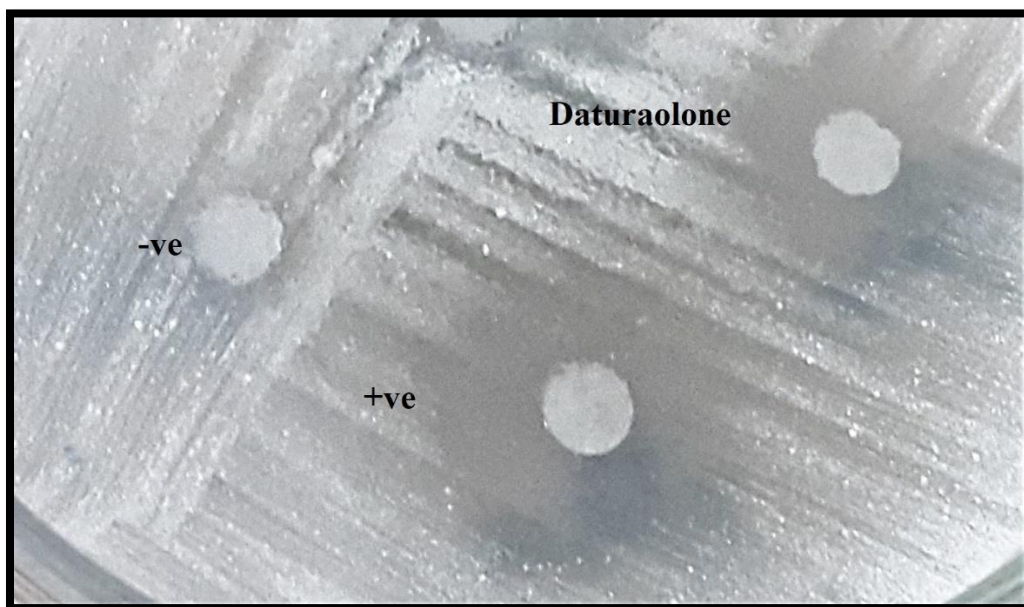

**Figure S3.** Protein kinase (PK) inhibitory potential of daturaolone (20 ug/disc). Surfactin infused disc was used as positive control and DMSO infused disc was used as negative control.
